# Supplementary material
Source: publisher site journal article supplement (https://en-cdn.bio-protocol.org/attached/file/20200720/3697%20Supplemental%20file%20Table%20S1.docx)
Supplement: Supplementary file 1 [file 3697%20Supplemental%20file%20Table%20S1.docx]

Table S1. Primer Design Script Flag Inputs*

| Command-line Flag | Description |
| --- | --- |
| '--output’ [output file] | This flag allows the user to specify a different filename for the output. By default, the script will write a list of primers to the file`[inputfile]-primers.csv`. |
| ‘--custom-codon’ [codon] | Use a specified codon as the mutagenic codon in all primers. The provided codon may be degenerate. This option allows you to, *e.g.*, generate an NNK mutagenic primer for each position in the coding sequence. Using this option disables most of the remaining functionality of the script. |
| ‘--separator’ [separator] | The character that will separate primer name and primer sequence in the output. Options are `comma` or `tab`. `comma` is the default. |
| ‘--resfile’ [resfile] | A resfile can be used to specify only desired mutations where each line of the file specifies a set of residues and mutation specification. This flag and `--custom-codon` are mutually exclusive. |
| ‘--include-stop-codons’ | If this flag is set, residues not mentioned in a resfile will be mutagenized to all twenty amino acids plus stops instead of just to all twenty amino acids.  This flag, `--no-default-mutagenesis`, and ‘--custom-codon’ are all mutually exclusive. |
| ‘--no-default-mutagenesis’ | The default behavior of the script is to mutagenize all residues to all twenty amino acids. If this flag is provided, the default is to do no mutagenesis except that specified by a resfile. If this flag is provided, a resfile must also be provided.  This flag and `--include-stop-codons`, and ‘--custom-codon’ are all mutually exclusive. |
| ‘--organism’ [organism] | This flag results in the most common codons being used for a given organism to make mutations. Options are either `ecoli`, `yeast`, `mouse`, or `human`. The default is `yeast`.  This flag and `--custom-codon` are mutually exclusive. |
| ‘--n-codons’ [number] | The number of codons for each mutation that should be used to generate primers.  By default, two codons are used (the two most common for an amino acid in the  organism selected). This flag and `--custom-codon` are mutually exclusive. |

**Table S1. Continued**

| ‘--five-prime-arm-length’ [length] | This specifies the upstream sequence length (downstream if you specified --antisense).  The default length is 30. |
| --- | --- |
| ‘--three-prime-arm-length’ [length] | This specifies the downstream sequence length (upstream if you specified --antisense).  The default length is 30. |
| ‘--primer-name-prefix’ [prefix] | Prefix all primer names by the user provided string [prefix]. |
| ‘--primer-name-format’ [format string] | This option allows the user to control how the primers are named in the output file.  By default, primers are named as [native][residue#][mutation]-[codon]-[codon#]. For example, a primer mutating S65 to A using the codon `GCC` might be named "S65A-GCC-1". This option allows you to provide a custom string in which special sequences are replaced with information about the primer. The special sequences are:  - `%n`: the native amino acid  - `%i`: the residue number  - `%a`: the mutated amino acid, empty string for custom codon  - `%c`: the codon used  - `%x`: the number of the codon used, always 1 for custom codon  The default primer naming corresponds to a format string of`"%n%i%a-%c-%x"`. |
| ‘--antisense’ | Generate antisense primers. Use this if nicking the antisense strand first. |

* See the accompanying README.md text file for complete information.
